# Supplementary material
Source: Springer Nature journal article supplement (https://www.springermedizin.de/resource/supplementary/12943_2009_678_MOESM6_ESM.pdf/9554562)

**A.**

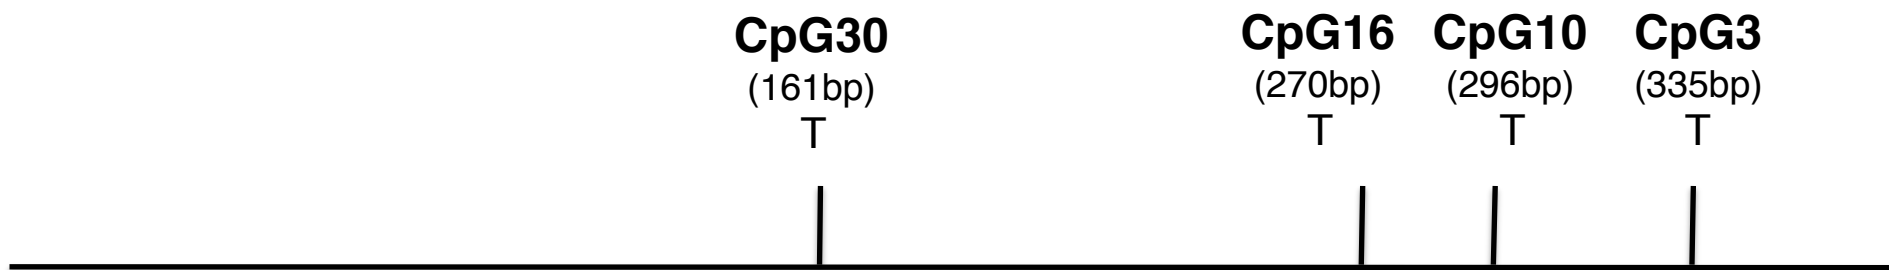

**B.**

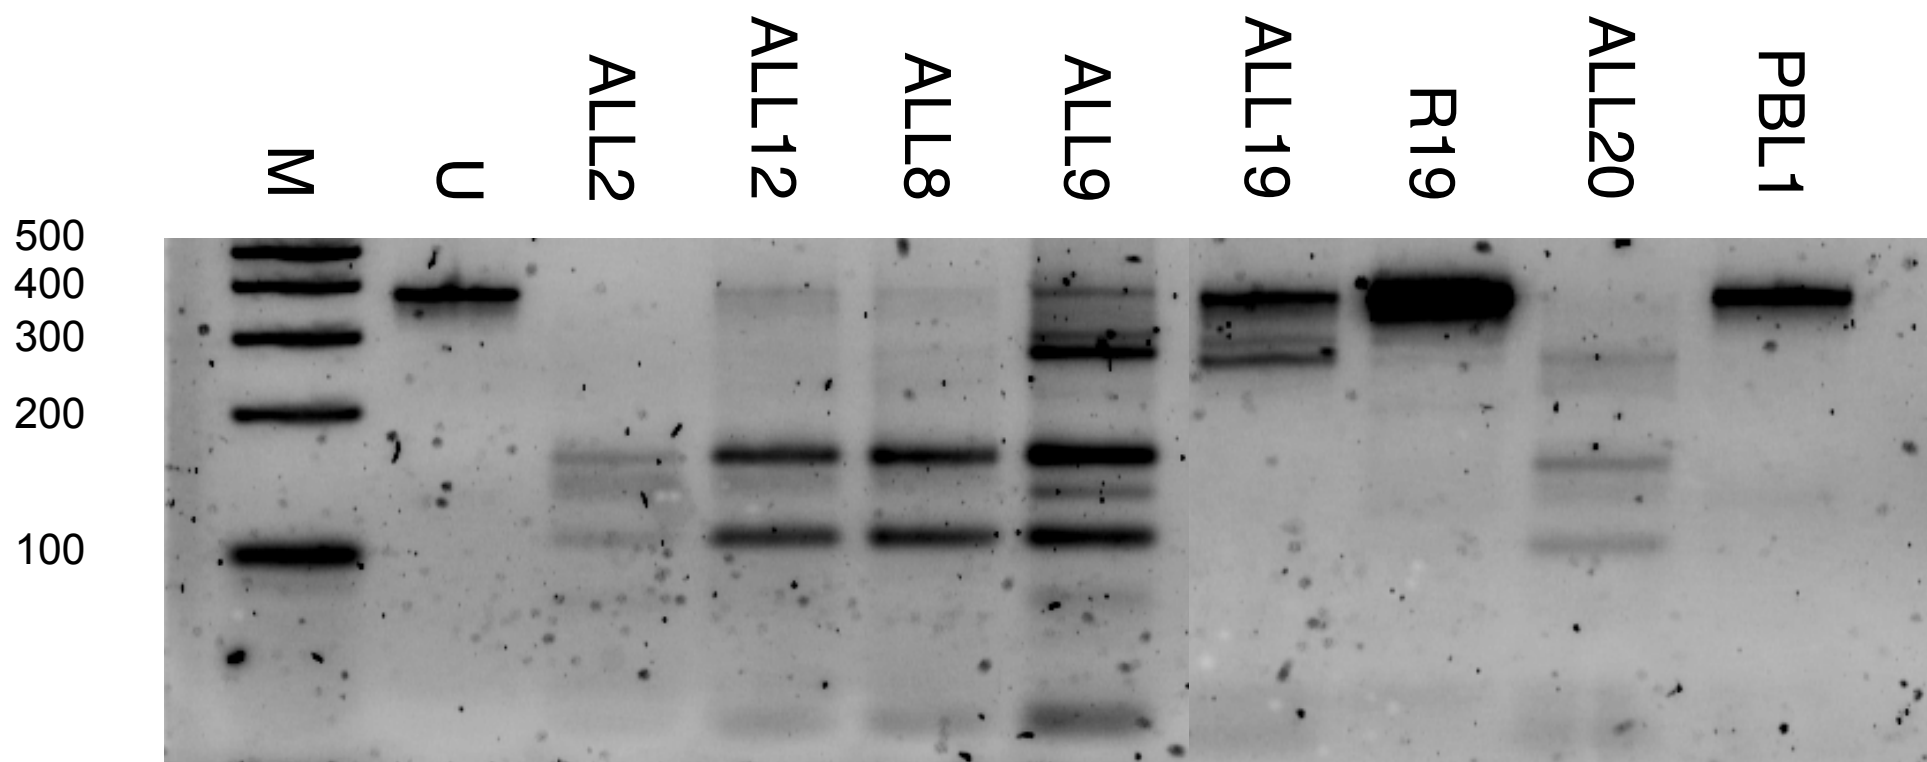

Supplement: MOESM6 [file 9554562]
